# Supplementary material
Source: PubMed Central journal article supplement (PMC8853681)
Supplement: iai.00548-21-s0001.pdf [file iai.00548-21-s0001.pdf]

Supplemental Data:

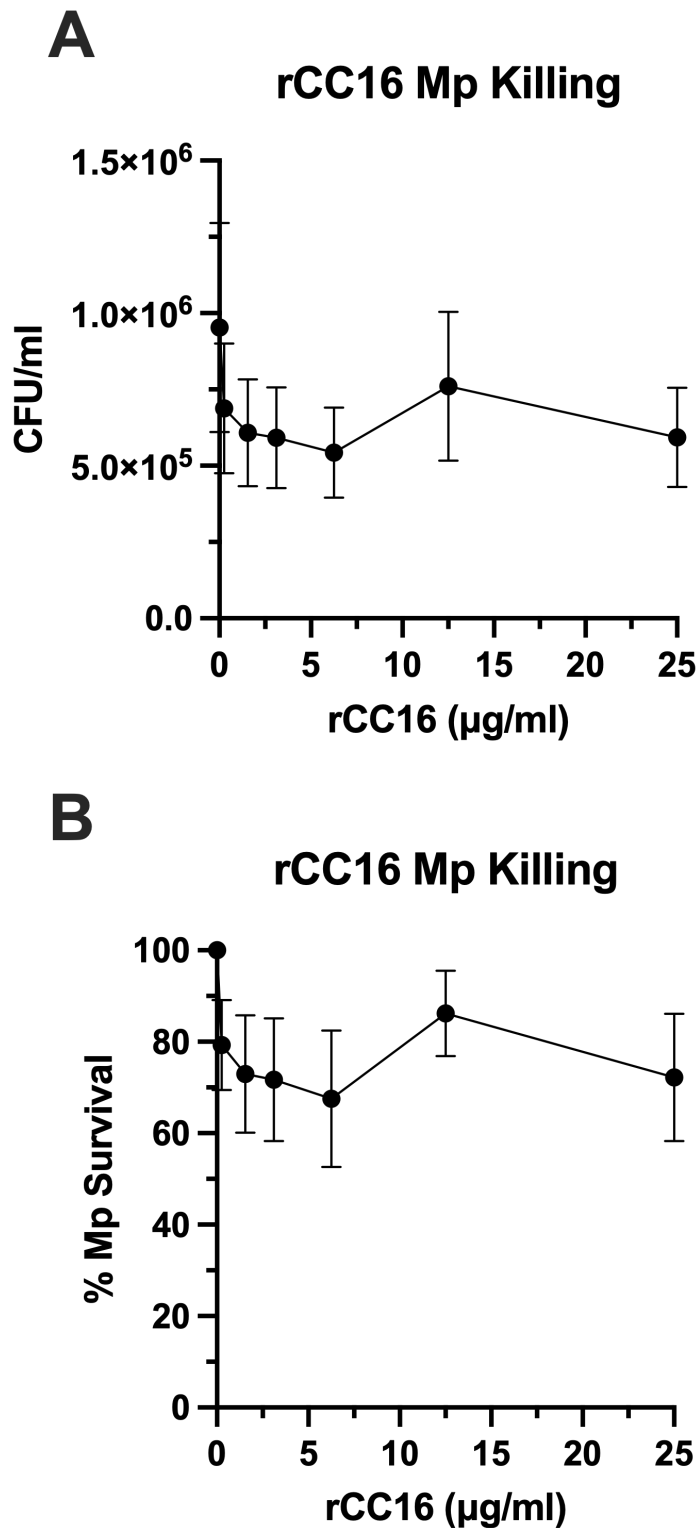

**Supplemental Figure 1. rCC16 does not kill Mp after 24 hours.** Mp was added to various concentrations of rCC16 (0, 0.25, 1.56, 3.12, 6.25, 12.5, and 25  $\mu\text{g/ml}$ ) ( $n=3$ ). Mp CFU/ml (A) and percent survival (B) were counted and calculated after a 2-week incubation on PPLO agar. All concentrations of rCC16 tested did not result in Mp killing.

**A**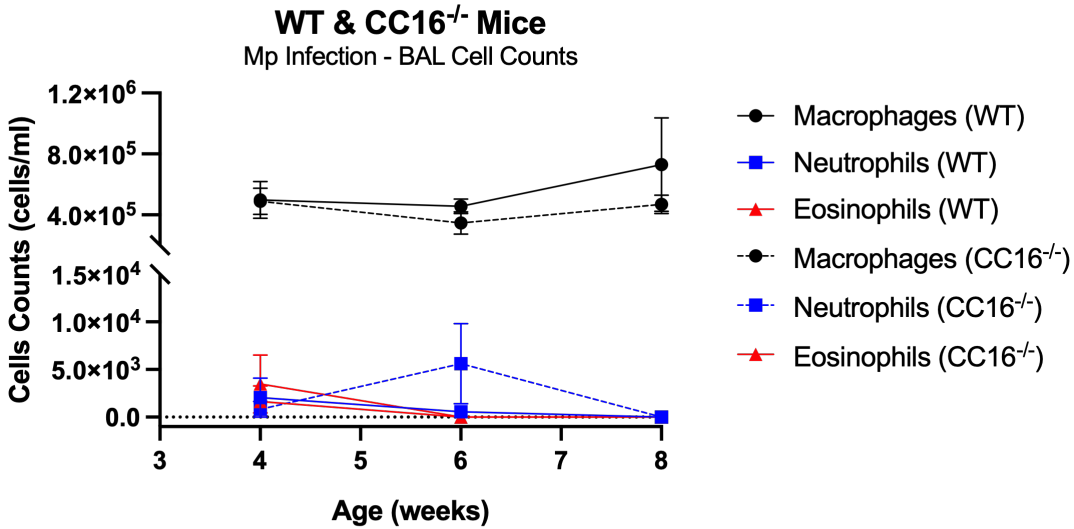**B**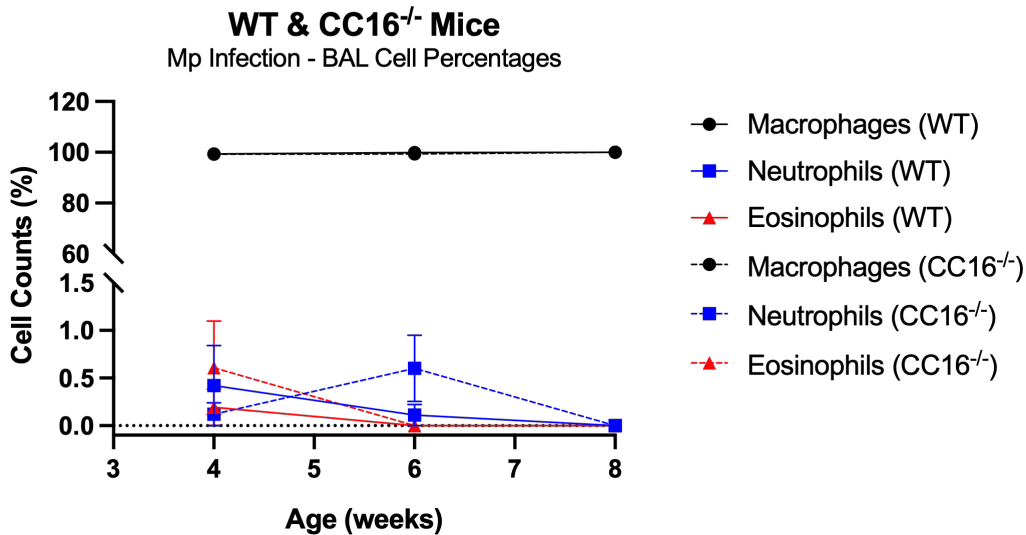

**Supplemental Figure 2. Macrophages constitute the majority of immune cells within the lungs of WT and CC16<sup>-/-</sup> mice from the ELIM.** Weanling (3-week-old) WT (n=12) and CC16<sup>-/-</sup> (n=12) mice were infected with Mp until they were four, six, or eight weeks old. Bronchoalveolar lavage fluid was obtained from the infected mice, H&E stained, and quantified for immune cell infiltrates. Total cell counts (A) and cell percentages (B) are shown for WT mice (solid lines) and CC16<sup>-/-</sup> mice (dotted lines). Macrophages constitute >99% of immune cells in BAL for WT and CC16<sup>-/-</sup> mice by eight weeks of age (ELIM).
